# Supplementary material
Source: PubMed Central journal article supplement (PMC3039120)
Supplement: NIHMS172393-supplement-supplement_1.pdf [file NIHMS172393-supplement-supplement_1.pdf]

## Supplemental data

### Time of Exposure to Curcumin

We determined how long of an exposure to curcumin was required for inhibition of mammosphere formation (Figure 5). We found that as little as 4 hr exposure to curcumin 5  $\mu$ M caused a 50% inhibition in mammosphere number and 10 $\mu$ M curcumin completely inhibited mammosphere formation. Greater than 25  $\mu$ M curcumin concentration caused complete inhibition of sphere formation and generalized cell death with 4 hours of exposure (Data not shown). The addition of 10  $\mu$ M piperine to 5  $\mu$ M curcumin concentration with 4 hr of exposure inhibited sphere number to less than 20% and completely inhibited sphere formation at exposure times of 24 hrs or more.

### Effect of Curcumin and Piperine on $\beta$ Catenin by Immunohistochemistry Staining

We also qualitatively demonstrated effect of piperine and curcumin on Wnt signaling using  $\beta$  catenin immunohistochemistry staining (supplemental data Figure 6). We found that curcumin 10  $\mu$ M and piperine 10  $\mu$ M completely inhibited intracellular  $\beta$  catenin expression compared to DMSO vehicle.

Figure 5 Time of Exposure to curcumin necessary to downregulate mammosphere formation (C5=curcumin 5  $\mu$ M; C10=curcumin 10  $\mu$ M; C10+P10=curcumin 5  $\mu$ M and piperine 10  $\mu$ M). Note that no spheres were formed at the C10+P10 concentrations.

Figure 6.  $\beta$  catenin staining in MCF 7 cells treated with curcumin and piperine.

Figure 5

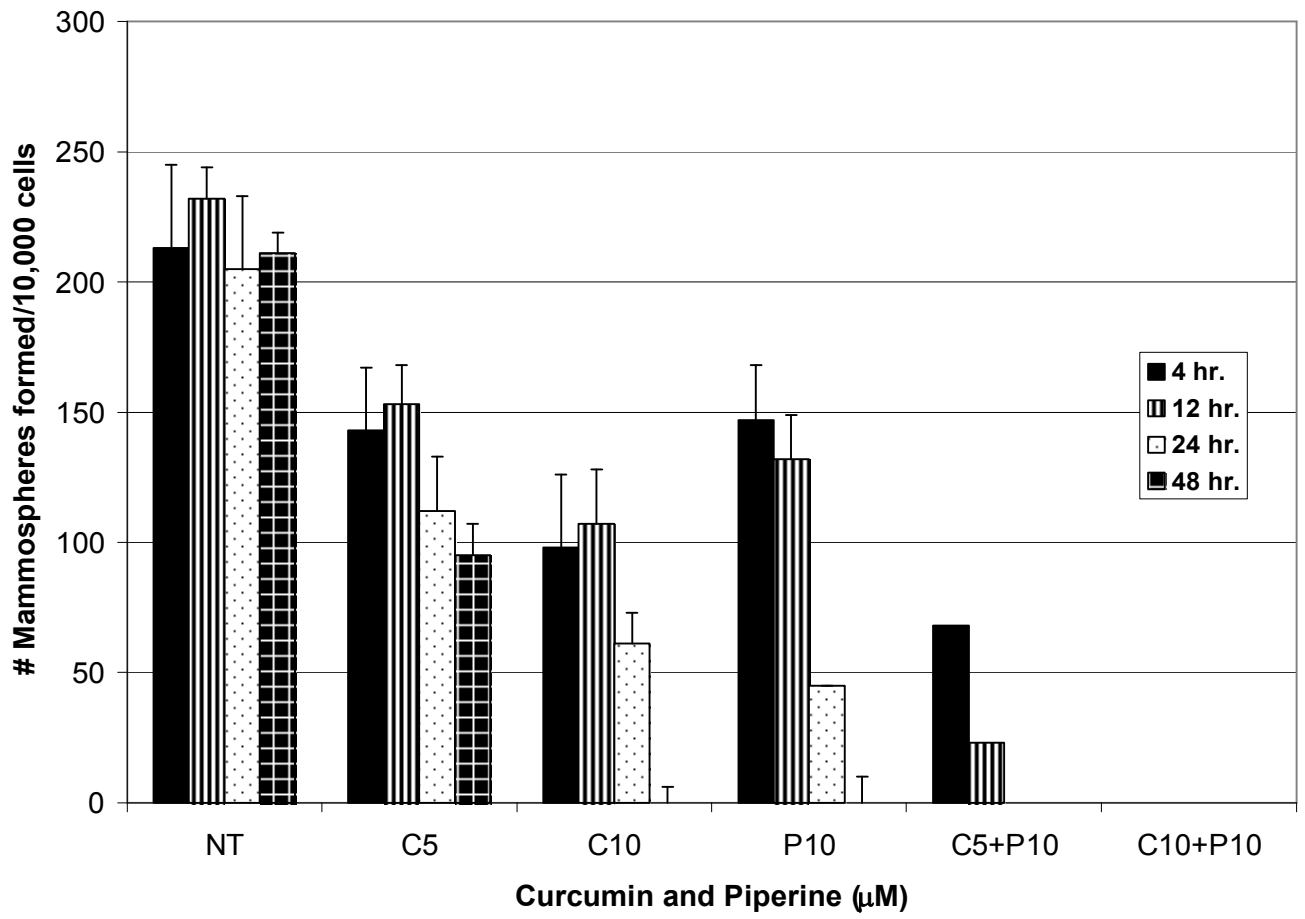

Figure 6  $\beta$  Catenin staining in MCF7 cells with DMSO control compared to curcumin and piperine treatment

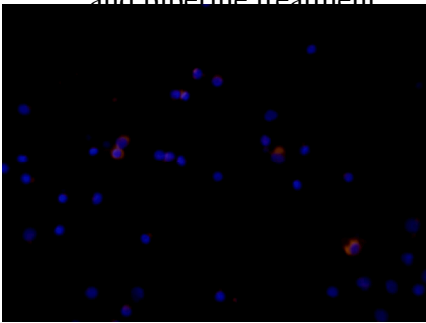

$\beta$  Catenin/DAPI staining with control

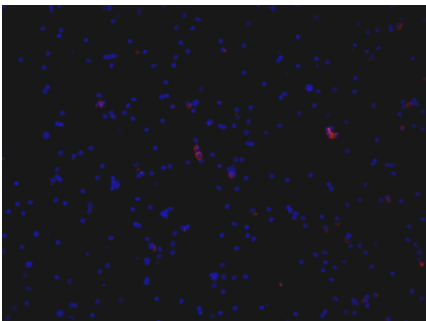

Curcumin 10  $\mu$ M- $\beta$  Catenin/DAPI staining

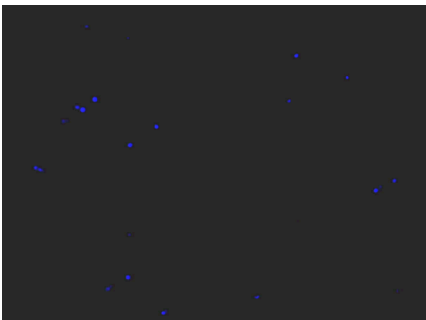

Piperine 10 $\mu$ M  $\beta$  Catenin/DAPI staining
